# Supplementary material
Source: publisher figshare collection journal article supplement (https://karger.figshare.com/ndownloader/files/29093079)
Supplement: Supplementary file 1 [file 29093079]

**Supplementary Table 1.** Relative abundance of phyla from supragingival microbiome in all subjects’ groups. (Fonte: MG-RAST).

| **Domain** | **Phylum** | **ANCL-CA** | **INCL-CA** | **S-CA** | **INCL-CI** | **S-CF** | **CA** |
| --- | --- | --- | --- | --- | --- | --- | --- |
| Bacteria | *Actinobacteria* | 35,4309 | 31,9129 | 22,6330 | 37,3696 | 38,0435 | 22,6330 |
| unclassified (derived from Bacteria) | 20,5139 | 16,6955 | 29,6014 | 24,8521 | 10,2466 | 29,6014 |
| *Firmicutes* | 16,3471 | 13,8534 | 11,0226 | 18,3013 | 15,7665 | 11,0226 |
| *Bacteroidetes* | 13,3583 | 22,9888 | 18,2013 | 9,2105 | 21,7997 | 18,2013 |
| *Fusobacteria* | 9,1938 | 9,8397 | 10,3640 | 5,6750 | 9,4207 | 10,3640 |
| *Proteobacteria* | 4,9799 | 4,4026 | 7,6617 | 4,3596 | 2,8903 | 7,6617 |
| *Tenericutes* | 0,0832 | 0,0383 | 0,0538 | 0,0716 | 0,0653 | 0,0538 |
| *Cyanobacteria* | 0,0291 | 0,0206 | 0,0155 | 0,0485 | 0,0503 | 0,0155 |
| *Spirochaetes* | 0,0288 | 0,2212 | 0,4143 | 0,0914 | 1,6060 | 0,4143 |
| *Chloroflexi* | 0,0144 | 0,0066 | 0,0012 | 0,0010 | 0,0105 | 0,0012 |
| *Deinococcus-Thermus* | 0,0077 | 0,0105 | 0,0081 | 0,0025 | 0,0016 | 0,0081 |
| *Verrucomicrobia* | 0,0068 | 0,0019 | 0,0087 | 0,0040 | 0,0002 | 0,0087 |
| *Synergistetes* | 0,0051 | 0,0074 | 0,0139 | 0,0109 | 0,0922 | 0,0139 |
| *Dictyoglomi* | 0,0004 | 0,0001 | 0,0000 | 0,0001 | 0,0000 | 0,0000 |
| *Thermotogae* | 0,0002 | 0,0000 | 0,0001 | 0,0001 | 0,0011 | 0,0001 |
| *Thermodesulfobacteria* | 0,0001 | 0,0000 | 0,0001 | 0,0000 | 0,0000 | 0,0001 |
| *Chlorobi* | 0,0001 | 0,0001 | 0,0000 | 0,0001 | 0,0001 | 0,0000 |
| *Fibrobacteres* | 0,0000 | 0,0001 | 0,0000 | 0,0001 | 0,0000 | 0,0000 |
| *Deferribacteres* | 0,0000 | 0,0001 | 0,0000 | 0,0000 | 0,0026 | 0,0000 |
| *Nitrospirae* | 0,0000 | 0,0001 | 0,0000 | 0,0000 | 0,0001 | 0,0000 |
| *Aquificae* | 0,0000 | 0,0000 | 0,0001 | 0,0000 | 0,0000 | 0,0001 |
| *Elusimicrobia* | 0,0000 | 0,0001 | 0,0001 | 0,0002 | 0,0026 | 0,0001 |
| *Acidobacteria* | 0,0000 | 0,0000 | 0,0000 | 0,0000 | 0,0000 | 0,0000 |
| *Planctomycetes* | 0,0000 | 0,0001 | 0,0001 | 0,0012 | 0,0000 | 0,0001 |
| *Chlamydiae* | 0,0000 | 0,0000 | 0,0000 | 0,0001 | 0,0000 | 0,0000 |
| *Chrysiogenetes* | 0,0000 | 0,0000 | 0,0000 | 0,0000 | 0,0000 | 0,0000 |
| *Lentisphaerae* | 0,0000 | 0,0000 | 0,0000 | 0,0000 | 0,0000 | 0,0000 |
| *Gemmatimonadetes* | 0,0000 | 0,0000 | 0,0000 | 0,0000 | 0,0000 | 0,0000 |
| *Candidatus Poribacteria* | 0,0000 | 0,0000 | 0,0000 | 0,0000 | 0,0000 | 0,0000 |
